# Supplementary material for: Distribution and Characterization of Antimicrobial Resistant Pathogens in a Pig Farm, Slaughterhouse, Meat Processing Plant, and in Retail Stores
Source: MDPI journal article supplement (doi:10.3390/microorganisms10112252), 2022-11-14
Supplement: s1 [file s1]

Supplementary data table S1. Pathogenic or spoilage bacteria isolated from the pig farms, slaughterhouse, meat processing plant, and retail stores

|                                     | Farm (3 barns, <i>n</i> = 72) |      |       |              |            |       |          |       | Slaughterhouse ( <i>n</i> = 18) |            |       |             |       |       | Meat processing plant ( <i>n</i> = 18) |            |            |       |       |       | Market ( <i>n</i> = 18) |           |
|-------------------------------------|-------------------------------|------|-------|--------------|------------|-------|----------|-------|---------------------------------|------------|-------|-------------|-------|-------|----------------------------------------|------------|------------|-------|-------|-------|-------------------------|-----------|
|                                     | Pig swab                      | Diet | Feces | Fluid manure | Floor swab | Glove | Fan swab | Water | Carcass swab                    | Floor swab | Glove | Cutter swab | Water | Drain | Meat swab                              | Floor swab | Table swab | Water | Glove | Drain | Belly swab              | Neck swab |
| <i>Acinetobacter baumannii</i>      |                               |      |       |              |            |       |          |       |                                 |            |       |             |       |       |                                        |            |            |       |       |       | 2                       |           |
| <i>Acinetobacter guiloniae</i>      |                               |      |       |              |            |       |          |       |                                 |            |       |             |       |       |                                        |            |            | 1     |       |       |                         |           |
| <i>Acinetobacter radioresistens</i> |                               |      |       |              |            |       | 1        |       |                                 |            |       |             |       |       |                                        |            |            |       |       |       |                         |           |
| <i>Aeromonas bestiarum</i>          |                               |      |       |              |            |       |          |       |                                 |            |       |             |       |       |                                        |            |            |       |       | 1     |                         |           |
| <i>Aeromonas eucrenophila</i>       |                               |      |       |              |            |       |          |       |                                 |            |       |             |       | 1     |                                        |            |            |       |       |       |                         |           |
| <i>Aeromonas hydrophila</i>         |                               |      |       |              |            |       |          |       |                                 | 1          |       |             |       |       |                                        | 1          |            |       |       |       |                         |           |
| <i>Aeromonas media</i>              |                               |      |       |              |            |       |          |       |                                 |            |       |             |       |       |                                        |            |            |       |       | 1     |                         |           |
| <i>Aeromonas veronii</i>            |                               |      |       |              |            |       |          |       |                                 | 1          |       |             |       |       |                                        |            |            |       |       | 2     |                         |           |
| <i>Aeromonas viridans</i>           |                               |      |       |              |            |       |          |       | 2                               |            |       |             |       |       |                                        |            |            |       |       |       | 1                       |           |
| <i>Alcaligenes faecalis</i>         |                               |      |       |              |            |       | 1        |       |                                 |            |       |             |       |       |                                        |            |            |       |       |       |                         |           |
| <i>Bacillus galactosidilyticus</i>  |                               |      |       |              |            |       |          |       |                                 |            |       |             |       |       |                                        |            |            |       |       |       |                         |           |
| <i>Buttiauxella gaviniae</i>        |                               |      |       |              |            |       |          |       | 5                               |            |       |             |       |       |                                        |            |            |       |       |       |                         |           |
| <i>Citrobacter braakii</i>          |                               |      |       |              |            |       |          |       |                                 | 1          | 1     | 2           |       |       |                                        |            |            |       |       |       |                         |           |
| <i>Citrobacter freundii</i>         |                               |      | 1     |              |            |       |          |       |                                 |            | 1     | 1           |       |       |                                        |            |            |       |       | 1     |                         |           |
| <i>Citrobacter koseri</i>           |                               |      |       |              |            |       |          |       |                                 |            | 1     | 2           |       |       |                                        |            |            |       |       |       |                         |           |
| <i>Corynebacterium stationis</i>    |                               |      |       |              | 2          |       |          |       |                                 |            |       |             |       |       |                                        |            |            |       |       |       |                         |           |
| <i>E. coli</i> O157:H7              |                               |      | 1     |              |            |       |          |       | 1                               |            | 1     |             |       |       |                                        |            |            |       |       |       | 9                       |           |
| <i>Enterobacter amnigenus</i>       |                               |      |       |              | 1          |       |          |       |                                 |            |       |             |       | 1     |                                        |            |            |       |       |       |                         |           |
| <i>Enterobacter asburiae</i>        |                               | 1    |       |              |            |       | 1        |       |                                 |            |       |             |       |       |                                        |            |            |       |       |       |                         |           |
| <i>Enterobacter cloacae</i>         |                               | 3    |       |              |            |       |          |       |                                 |            |       |             |       |       |                                        | 1          |            |       |       |       |                         |           |
| <i>Escherichia coli</i>             |                               |      | 7     | 1            |            |       |          |       |                                 |            |       |             |       |       |                                        |            | 2          |       |       |       |                         | 1         |
| <i>Escherichia hermannii</i>        | 1                             |      |       |              |            |       | 1        |       |                                 |            |       |             |       |       |                                        |            |            |       |       |       |                         |           |
| <i>Ewingella americana</i>          |                               |      |       |              |            |       |          |       |                                 |            |       |             |       |       |                                        |            |            |       |       |       | 1                       |           |
| <i>Exiguobacterium aurantiacum</i>  |                               |      |       |              |            |       |          |       |                                 |            |       | 1           |       |       |                                        |            |            |       |       |       |                         |           |
| <i>Exiguobacterium</i> sp.          |                               |      |       |              |            |       |          |       |                                 |            |       |             |       |       |                                        | 6          |            |       |       |       |                         |           |
| <i>Hafnia alvei</i>                 |                               |      |       |              |            |       |          |       | 2                               |            |       |             |       |       | 5                                      |            |            |       |       |       |                         | 3         |
| <i>Kocuria rhizophila</i>           |                               |      |       |              |            |       |          |       |                                 |            |       |             |       |       |                                        |            |            |       |       |       | 1                       |           |
| <i>Leclercia adecarboxylata</i>     | 4                             |      |       |              |            |       |          |       |                                 |            |       |             |       |       |                                        |            |            |       |       |       |                         |           |
| <i>Listeria grayi</i>               |                               |      |       |              |            |       |          |       |                                 |            |       |             |       |       |                                        |            |            |       |       | 1     |                         |           |
| <i>Listeria monocytogenes</i>       |                               |      |       |              |            |       |          |       |                                 |            |       |             |       |       | 1                                      |            |            |       |       |       |                         |           |
| <i>Lysinibacillus fusiformis</i>    | 1                             |      |       |              |            |       |          |       |                                 |            |       |             |       |       |                                        |            |            |       |       |       | 1                       |           |

[illegible]
